# Supplementary material
Source: ML conference proceedings conference paper supplement (https://openreview.net/forum?id=MXRO5kukST)
Supplement: supplementary_material [file attachment]

---

# Supplementary Materials

## SAND: Smooth Imputation Of Sparse And Noisy Functional Data With Transformer Networks

---

**Ju-Sheng Hong\***  
Department of Statistics  
University of California Davis  
Davis, CA 95616  
jsdhong@ucdavis.edu

**Junwen Yao**  
Department of Statistics  
University of California Davis  
Davis, CA  
jwyao@ucdavis.edu

**Jonas Mueller**  
Cleanlab  
Cambridge, MA  
jonaswmueller@gmail.com

**Jane-Ling Wang**  
Department of Statistics  
University of California Davis  
Davis, CA  
janelwang@ucdavis.edu

We present the proof of our major results in section 1 and additional numerical experiments in section 2. In addition to the notations introduced in the main text, we add a few more in the supplement. The bold symbol  $\mathbf{x}_a$  represents a length- $a$  vector (either a row or column vector) with a constant value  $x$ . In a similar fashion, we use  $\mathbf{x}_{a \times b}$  to denote an  $a \times b$  matrix with a constant value  $x$ .

## 1 Missing proofs

### 1.1 Proof of Theorem 1

One can easily see that  $\mathcal{I}$  is dense in  $[0, 1]$  as  $M$  approaches infinity. Let  $x(t)$  be an Riemann integrable function defined on  $[0, 1]$  and  $x_M$  be the vector whose entries are  $x$  evaluated at points in  $\mathcal{I}$ , i.e.,

$$x_M = \left( x(0), x\left(\frac{1}{M-1}\right), x\left(\frac{2}{M-1}\right), \dots, x(1) \right).$$

For any positive number  $a \in [0, 1]$ , define  $a_M = \min\{z \mid a \leq z/(M-1), z \in \mathbb{Z}^+\}$ . Since  $a_M/(M-1) \rightarrow a$  as  $M \rightarrow \infty$ , we can verify that

$$\lim_{M \rightarrow \infty} \left[ \text{cumsum} \left( \frac{x_M}{M-1} \right) \right]_{a_M} = \lim_{M \rightarrow \infty} \frac{1}{M-1} \sum_{i=1}^{a_M} x \left( \frac{i}{M-1} \right) \quad (1)$$

$$= \int_0^a x(t) dt, \quad (2)$$

where (1) is the upper Riemann sum of  $x(\cdot)$  on  $[0, a_M]$  and it becomes (2) since  $x(\cdot)$  is Riemann integrable. Hence, the cumsum operator becomes an integral operator as  $M \rightarrow \infty$ . To complete the proof, we remark that the integral of a continuous function is differentiable; thus, the imputation from SAND is differentiable provided that  $\tilde{T}$  is continuous.  $\square$

---

\*Correspondence to: Ju-Sheng Hong jsdhong@ucdavis.edu.

## 1.2 Proof of Theorem 2

Recall the definitions of  $\tilde{T}$ ,  $\tilde{T}_c$ ,  $\tilde{\mathbf{T}}$ , and  $\tilde{\mathbf{T}}_c$  in section 3.2. By Lemma 1.1, for any  $h_d$ , there exists a SAND and a corresponding  $M$ -by- $M$  matrix  $\mathbf{P}$  such that the imputation is  $\hat{T}_i = (\tilde{T}_i)_1 + \tilde{T}_{i,c}\mathbf{P}$  for subject  $i$ . Therefore,

$$\begin{aligned}\|d_i^{\text{mask}} \odot (\tilde{T}_i - \hat{T}_i)\|_2^2 &= \|d_i^{\text{mask}} \odot [\tilde{T}_i - ((\tilde{T}_i)_1 + \tilde{T}_{i,c}\mathbf{P})]\|_2^2 \\ &= \|d_i^{\text{mask}} \odot (\tilde{T}_{i,c} - \tilde{T}_{i,c}\mathbf{P})\|_2^2,\end{aligned}$$

where  $u \odot v$  is the element-wise product of  $u$  and  $v$ . To finish this proof, we first prove the inequality in Theorem 2 by giving an explicit form of  $\mathbf{P}$  and then show that this particular  $\mathbf{P}$  can be learned by SAND. Without loss of generality, we can assume that the first element in  $\tilde{T}_i$  is 0 for all subjects. Since  $d_i^{\text{mask}} = (d_{i1}, \dots, d_{iM})$  and  $d_{ij} \in \{0, 1\}$  for all  $i \in \mathbb{A}$  and  $j \in \{1, \dots, M\}$ , we have

$$\sum_{i \in \mathbb{A}} \|d_i^{\text{mask}} \odot (\tilde{T}_i - \tilde{T}_i\mathbf{P})\|_2^2 \leq \sum_{i \in \mathbb{A}} \|\tilde{T}_i - \tilde{T}_i\mathbf{P}\|_2^2 \quad (3)$$

$$= \sum_{i \in \mathbb{A}} \tilde{T}_i\mathbf{P}\mathbf{P}^T\tilde{T}_i^T - \sum_{i \in \mathbb{A}} \tilde{T}_i\mathbf{P}\tilde{T}_i^T - \sum_{i \in \mathbb{A}} \tilde{T}_i\mathbf{P}^T\tilde{T}_i^T + \sum_{i \in \mathbb{A}} \tilde{T}_i\tilde{T}_i^T. \quad (4)$$

To simplify our argument, we denote  $\mathbf{X}_T$  as  $\sum_i \tilde{T}_i^T\tilde{T}_i$  and let  $\text{tr}(\cdot)$  be the trace operator. Since  $\text{tr}(\cdot)$  is invariance under cyclic permutation, (4) becomes

$$\text{tr}(\mathbf{P}\mathbf{P}^T\mathbf{X}_T) - \text{tr}(\mathbf{P}\mathbf{X}_T) - \text{tr}(\mathbf{P}^T\mathbf{X}_T) + \text{tr}(\mathbf{X}_T). \quad (5)$$

Suppose that  $\mathbf{P}$  is a symmetric matrix and  $\mathbf{P} = \mathbf{U}_P\Sigma_P\mathbf{U}_P^T$  is the eigendecomposition, where  $\Sigma_P = \text{diag}(a_1, \dots, a_M)$  and  $\{a_j\}_{j=1}^M$  is the non-increasing eigenvalues. Then,

$$(5) = \text{tr}(\mathbf{U}_P\Sigma_P^2\mathbf{U}_P^T\mathbf{X}_T) - 2\text{tr}(\mathbf{U}_P\Sigma_P\mathbf{U}_P^T\mathbf{X}_T) + \text{tr}(\mathbf{X}_T). \quad (6)$$

As  $\mathbf{X}_T$  is symmetric, it has the eigendecomposition, namely  $\mathbf{X}_T = \mathbf{U}_T\Sigma\mathbf{U}_T^T$  where  $\Sigma = \text{diag}(\lambda_1, \dots, \lambda_M)$  and  $\{\lambda_j\}_{j=1}^M$  is the non-increasing eigenvalues. We pick  $\mathbf{U}_P = \mathbf{U}_T$  and denote the diagonal elements of  $\mathbf{U}_T^T\mathbf{X}_T\mathbf{U}_T$  as  $a_1, \dots, a_M$ . Using the property of trace where it is invariant under cyclic permutation again, (6) becomes

$$\sum_{j=1}^M a_j^2\lambda_j - 2a_j\lambda_j + \lambda_j. \quad (7)$$

Next, we want to minimize (7) over  $a_j \in \mathbb{R}$  for all  $j$ . First, we notice that  $\lambda_j \geq 0$  for all  $j$  since  $\mathbf{X}_T = \mathbf{U}_T\Sigma\mathbf{U}_T^T$  is a semi-positive definite matrix. Then, we set the first derivative of (7) with respect to  $a_j$  as 0 and get  $a_j = 1$  for all  $j$ . However, when  $\mathbf{P}$  is not full-rank, say  $\text{rank}(\mathbf{P}) = d_\epsilon$ , there will be  $(M - d_\epsilon)$  zeros in  $\{a_j\}_{j=1}^M$ . As a result, all  $a_j$  must be in  $\{0, 1\}$  regardless of the rank of  $\mathbf{P}$ . Under the rank insufficient case, we need to decide which  $a_j$  should be 0. To do this, we notice that

$$a_j^2\lambda_j - 2a_j\lambda_j + \lambda_j = \begin{cases} 0, & \text{when } a_j = 1; \\ \lambda_j, & \text{when } a_j = 0. \end{cases} \quad (8)$$

Consequently, if  $\mathbf{P}$  is of rank  $d_\epsilon$ ,  $a_1, \dots, a_{d_\epsilon}$  must be 1 to minimize (7), as  $\{\lambda_j\}_{j=1}^M$  is non-increasing. To sum up, the minimum of (3) over  $\mathbf{P}$  being symmetric with rank  $d_\epsilon$  is obtained when

$$\mathbf{P} = \mathbf{U}_T\text{diag}(\mathbf{1}_{d_\epsilon}, \mathbf{0}_{M-d_\epsilon})\mathbf{U}_T^T. \quad (9)$$

In addition, (8) implies that the minimum of (3) is  $\sum_{j=d_\epsilon+1}^M \lambda_j$ . As  $d_\epsilon$  satisfies  $\sum_{j=1}^d \lambda_j / \sum_{j=1}^M \lambda_j \geq 1 - \epsilon$  and  $\sum_{i \in \mathbb{A}} \|\tilde{T}_i\|_2^2 = \sum_{i \in \mathbb{A}} \tilde{T}_i\tilde{T}_i^T = \text{tr}(\mathbf{X}_T) = \sum_{j=1}^M \lambda_j$ , we have

$$\frac{1}{\|\mathbb{A}\|_0} \sum_{i \in \mathbb{A}} \|d_i^{\text{mask}} \odot (\tilde{T}_i - \hat{T}_i)\|_2^2 \leq \frac{\epsilon}{\|\mathbb{A}\|_0} \sum_{i \in \mathbb{A}} \|\tilde{T}_i\|_2^2$$

provided that  $\hat{T}_i$  can be written as  $\tilde{T}_i\mathbf{P}$  where  $\mathbf{P}$ , described in (9), can be learned by a SAND.

To show that there exists a SAND which learns  $\mathbf{P}$ , we let

- $\mathbf{U}_{T,\epsilon}$  denote the truncated  $\mathbf{U}_T$  where only the first  $d_\epsilon$  columns are preserved, i.e.,  $\mathbf{U}_{T,\epsilon} = \mathbf{U}_T[:, 1, \dots, d_\epsilon]$ ,
- $\mathbf{I}$  be the positional encoding matrix for the output grid  $\mathcal{I}$ ,
- $\mathbf{B}$  as an  $M$ -by- $M$  matrix where the elements of  $\mathbf{B}$  satisfy

$$(\mathbf{B})_{ij} = \begin{cases} 1/(M-1), & \text{if } j \geq i; \\ 0, & \text{otherwise.} \end{cases}$$

Then by Lemma 1.1 combined with (11) and (12), an imputation from such SAND becomes

$$\tilde{T}_i \left[ \left( \mathbf{W}_K \tilde{\mathbf{T}}_c \right)^\top \left( \mathbf{W}_Q \tilde{\mathbf{T}}_c \right) / \sqrt{h_d} \right] \mathbf{B} \quad (10)$$

and by taking  $\mathbf{W}_K = \sqrt{h_d} \mathbf{U}_{T,\epsilon}^\top (\mathbf{0} \mathbf{I}^{-1})$  and  $\mathbf{W}_Q = \sqrt{h_d} \mathbf{U}_{T,\epsilon}^\top \mathbf{B}^{-1} (\mathbf{0} \mathbf{I}^{-1})$ , we have (10) =  $\tilde{T}_i \mathbf{U}_{T,\epsilon} \mathbf{U}_{T,\epsilon}^\top = \tilde{T}_i \mathbf{P}$ .  $\square$

### 1.3 Supporting Lemmas for Theorem 2

**Lemma 1.1.** *Suppose that SAND has a single-head structure. Then for any  $h_d$ , there exists a SAND with a corresponding matrix  $\mathbf{P}$  such that, for any subject  $i$ , the imputation can be written as  $(\tilde{T}_i)_1 + \tilde{T}_{i,c} \mathbf{P}$ , and it becomes  $\tilde{T}_i \mathbf{P}$  when  $(\tilde{T}_i)_1 = 0$ .*

*Proof.* Recall that

$$\begin{aligned} \text{SAND}(\tilde{\mathbf{T}}_i) &= (\tilde{T}_i)_1 + \text{Intg}(\tilde{D}_i) \\ &= (\tilde{T}_i)_1 + \text{Intg}[\text{Diff}(\tilde{\mathbf{T}}_{i,c})], \end{aligned}$$

where  $\text{Diff}(\cdot)$  and  $\text{Intg}(\cdot)$  are defined according to

$$\begin{aligned} \tilde{D}_i &= \text{Diff}(\tilde{\mathbf{T}}_{i,c}) = W_O \left( \mathbf{W}_V \tilde{\mathbf{T}}_{i,c} \right) \left[ \left( \mathbf{W}_K \tilde{\mathbf{T}}_{i,c} \right)^\top \left( \mathbf{W}_Q \tilde{\mathbf{T}}_{i,c} \right) / \sqrt{h_d} \right], \\ \text{Intg}(\tilde{D}_i) &= \text{cumsum} \left[ \tilde{D}_i / (M-1) \right]. \end{aligned}$$

Define  $\mathbf{B}$  as an  $M$ -by- $M$  matrix where the elements of  $\mathbf{B}$  satisfy

$$(\mathbf{B})_{ij} = \begin{cases} 1/(M-1), & \text{if } j \geq i; \\ 0, & \text{otherwise.} \end{cases}$$

Then the output of SAND can be written as

$$\begin{aligned} \text{SAND}(\tilde{\mathbf{T}}_i) &= (\tilde{T}_i)_1 + \text{Intg}[\text{Diff}(\tilde{\mathbf{T}}_{i,c})] \\ &= (\tilde{T}_i)_1 + W_O \left( \mathbf{W}_V \tilde{\mathbf{T}}_{i,c} \right) \left[ \left( \mathbf{W}_K \tilde{\mathbf{T}}_{i,c} \right)^\top \left( \mathbf{W}_Q \tilde{\mathbf{T}}_{i,c} \right) / \sqrt{h_d} \right] \mathbf{B}. \end{aligned} \quad (11)$$

Define

$$\mathbf{P}_i = \left[ \left( \mathbf{W}_K \tilde{\mathbf{T}}_{i,c} \right)^\top \left( \mathbf{W}_Q \tilde{\mathbf{T}}_{i,c} \right) / \sqrt{h_d} \right] \mathbf{B}.$$

Because  $\mathbf{P}_i$  is an  $M$ -by- $M$  matrix, by taking

$$W_O = (1 \quad \mathbf{0}_{1 \times d}) \quad \text{and} \quad \mathbf{W}_V = \begin{bmatrix} \mathbf{1}_{1 \times M} \\ \mathbf{0}_{d \times M} \end{bmatrix}, \quad (12)$$

we obtain  $W_O(\mathbf{W}_V \tilde{\mathbf{T}}_{i,c}) = \tilde{T}_{i,c}$ . Also it is worth noticing that  $W_O(\mathbf{W}_V \tilde{\mathbf{T}}_{i,c}) = \tilde{T}_i$  when  $(\tilde{T}_i)_1 = 0$ . To show that there exists a matrix  $\mathbf{P}$  such that  $\mathbf{P}_i \equiv \mathbf{P}$  for all  $i$ , we denote  $\mathbf{I}$  as the positional encoding of the output grid  $\mathcal{I}$ . For any subject  $i$ , we have  $\tilde{\mathbf{T}}_{i,c} = \begin{bmatrix} \tilde{T}_{i,c} \\ \mathbf{I} \end{bmatrix}$ . Therefore, when the first columns in  $\mathbf{W}_K$  and  $\mathbf{W}_Q$  are zeros, all  $\mathbf{P}_i$  are the same.  $\square$

## 1.4 Proof of Corollary 1

Lemma 1.1 shows that there exists a  $\mathbf{P}$  such that.

$$\begin{aligned} \|d_i^{\text{mask}} \odot (\tilde{T}_i - \hat{T}_i)\|_2^2 &= \|d_i^{\text{mask}} \odot [\tilde{T}_i - ((\tilde{T}_i)_1 + \tilde{T}_{i,c}\mathbf{P})]\|_2^2 \\ &= \|d_i^{\text{mask}} \odot (\tilde{T}_{i,c} - \tilde{T}_{i,c}\mathbf{P})\|_2^2. \end{aligned}$$

When all elements in  $d_i^{\text{mask}} = 1$ , the last expression becomes

$$\|(\tilde{T}_{i,c}(I_M - \mathbf{P}))\|_2^2.$$

Notice that the rank of  $\mathbf{P}$  is determined by the minimum of  $\text{rank}(\mathbf{W}_K)$ ,  $\text{rank}(\mathbf{W}_Q)$  and  $\text{rank}(\tilde{\mathbf{T}}_c)$ . As  $d = M$ ,  $\text{rank}(\tilde{\mathbf{T}}_c) = M$  and  $\text{rank}(\mathbf{P}) = h_d = d_\epsilon$ . To see the minimum is attained at  $\epsilon/\|\mathbb{A}\|_0 \sum_{i \in \mathbb{A}} \|\tilde{T}_{i,c}\|_2^2$ , we follow the proof of Theorem 2 and notice that in the settings of this corollary, the inequality in (3) is actually an equality. Thus, the minimum is  $\frac{\epsilon}{\|\mathbb{A}\|_0} \sum_{i \in \mathbb{A}} \|\tilde{T}_{i,c}\|_2^2$ .  $\square$

## 2 Additional experiment study

**Code availability & reproducibility.** The code, checkpoints, and real datasets are provided in a separate .zip file.

**Numerical analysis of Diff.** In Figure S1, we illustrate the effectiveness of Diff in capturing the overall trend of the true derivative (the black dashed curve) using simulated data where observations (blue dots) are sampled from the underlying process (the green dashed curve). Despite lacking direct access to the derivative and no explicit instruction to do so, Intg indirectly guides Diff to produce outcomes (the orange curve) akin to derivatives. As illustrated in the right panel of Figure S1, Diff adeptly captures the general trend of the true derivative, despite operating without this information.

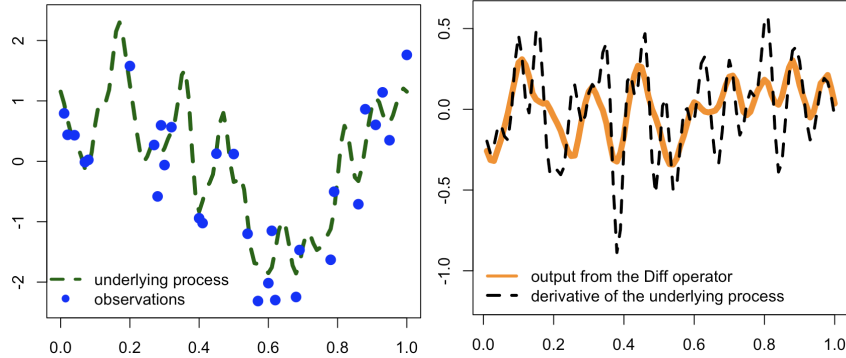

Figure S1: The comparison between a Diff output (the orange curve) and the first derivative (the black curve) of the corresponding underlying process (the green dashed curve).

### 2.1 Discussion of [3, 1, 2]’s methods

In this section, we provide additional details regarding the comparison of our method with [3, 1]’s methods. [3] relies on the EM algorithm (computationally expensive), known to be unstable with sparse data, as highlighted in [1]. [1] is later improved by [2] as disclosed in James’ website so we only include [2]’s method in our analyses. [2]’s package is called FPCA in the R software; however, to prevent confusion with the established functional principal component analysis (FPCA), we denote their method as mFPCA. Here, the ’m’ signifies its maximum likelihood foundation, distinguishing it as a likelihood-based approach.

### 2.2 Additional Simulation Results

Our experiments involve six scenarios which differ in terms of the distribution of the scores ( $a_{ik}$  and  $b_{ik}$ ) and the complexity (i.e. number of eigen-components  $K$ ) of the underlying data-generating processes. Specifically, we consider three different generating distributions:

- $\mathcal{E}$ : the exponential distribution with rate 1, which reflects a heavy-tailed process;
- $\mathcal{T}$ : the  $t$ -distribution with 5 degrees of freedom;
- $\mathcal{G}$ : the standard Gaussian distribution.

Beyond different generating distributions, we also study how the data dimension  $K$  affects various imputation methods, considering a:

- low dimensional case (LowDim) where:  $K = 5$
- high dimensional case (HighDim) where:  $K = 20$

Table S1 categorizes the experiment outcomes according to their setup and provides links to the tables containing the details of each experiment. Except for Table 1 in the main text, the remaining tables are presented in this supplement (indicated by the prefix S).

Table S1: Correspondence between experimental setups and tables of results.

|        | HighDim            |               |               | LowDim        |               |               |
|--------|--------------------|---------------|---------------|---------------|---------------|---------------|
|        | $\mathcal{E}$      | $\mathcal{T}$ | $\mathcal{G}$ | $\mathcal{E}$ | $\mathcal{T}$ | $\mathcal{G}$ |
| Tables | 1, S2, S3, S4 & S5 | S7            | S9            | S6            | S8            | S10           |

**Result.** In Table S2, we look at the same scenario as in Table 1 and use transformers with ReLU activation (RT) to report the Mean Squared Errors (MSE) and Total Variations (TV). We find that RT and GT (GeLU-activated transformers) perform similarly. Figure 1 reveals that both RT and GT models face a problem with smoothness in their imputations. Next, we assume the signal-to-noise ratio is 0 and investigate the performance of SAND under the error-free case. In Table S3, there is an overall decrease in MSE and TV among most methods, and SAND demonstrates the best performance. Given the similar performance between RT and GT, we focus on GT results for subsequent scenarios. In Tables S4 & S5, we deal with a scenario similar to Tables S2 & S3, except that the time points  $t_{ij}$  are now dependent within each subject  $i$ . In this scenario, Transformer-based models outperform all other basic methods. Among transformers, SAND has the smallest MSE in every case and it effectively reduces TV, demonstrating its ability to create smooth imputations. Tables S6, S7, S8, S9, S10 report the performance of eight imputation methods: PACE, FACE, mFPCA, MICE, CNP, GAIN, IDS and SAND. Among these methods, either PACE or SAND consistently outperforms the other six methods.

When the underlying process is a Gaussian process, Tables S9 and S10 show that PACE performs the best (as expected in this setting where its assumptions are perfectly met). This can be explained partly by equation  $E(\xi_{ik} | \tilde{Y}_i) = \lambda_k \phi_{ik}^T \Sigma_{Y_i}^{-1} (Y_i - \mu_i)$ , which holds under the Gaussian assumption. While SAND does not reach the same level of performance as PACE for Gaussian scores, it still significantly outperforms the other methods. Interestingly, the performance gap between PACE and SAND narrows as the number of basis functions used in the data-generating process increases.

For all other scenarios with asymmetric distributions, Tables S2, S3, S4, S5 and S6 illustrate that SAND takes the lead over PACE in all situations, except for very simple scenarios where the data is densely observed and the number of basis functions is low.

For score distributions following a  $t$ -distribution, as shown in Tables S7 and S8, SAND tends to deliver better results than PACE as the number of basis functions used in the data-generating process increases. In general, when the scores are non-Gaussian and the number of basis functions used in the data-generating process is high, SAND consistently outperforms PACE irrespective of the sparsity of observations, as depicted in Tables S2, S3, S4, S5 and S7.

In summary, while PACE excels in handling simple scenarios like Gaussian processes with a low number of basis functions, SAND offers more robust imputation performance across a broader range of data-generating processes, including asymmetric or  $t$ -distributions, and those involving a large number of basis functions.

### 2.3 Limitations of SAND

While SAND demonstrates superior performance across various complex scenarios and asymmetric score distributions, it has limitations when applied to simpler data structures, particularly when the underlying process is generated by a low number of basis functions *and* the score distribution is symmetric. In these cases, SAND does not outperform PACE, which is specifically designed to excel under symmetric distribution assumptions.

PACE’s exceptional performance in these simpler scenarios is due to the fact that the setting perfectly fits its model assumptions. This gives PACE a distinct advantage, making it the optimal choice under such conditions. However, despite this specific advantage of PACE, SAND still maintains competitive performance, often ranking as the second-best method among ten competing techniques. In addition, as the number of basis functions increases, the performance gap between PACE and SAND narrows. The Mean Squared Errors (MSE) of SAND are comparable to those of PACE, indicating that while PACE may have a slight edge, SAND remains a viable method.

The primary reason for SAND’s comparatively lower performance in the non-complex scenarios lies in its neural network architecture. Neural networks generally exhibit their strengths when handling complex data structures. Therefore, when faced with simpler data, SAND’s advantages are less pronounced.

In summary, SAND’s limitations are most evident in scenarios where both the data-generating process is simple *and* the score distribution is symmetric that are ideally suited for PACE. In such cases, PACE outperforms SAND. However, SAND still delivers strong results, showcasing its robustness and flexibility across a broad range of scenarios.

### 2.4 Additional Data Application Results

In this section, we alter our approach by sampling time points  $t_{ij}$  in a dependent manner within each subject in the UK electricity dataset and present the results in Table S11. Once again, SAND maintains its superior performance in terms of MSE. A direct comparison between rows representing by GT and SAND suggests its ability to generate smooth imputations. This observation aligns with the evidence presented in Figure S2.

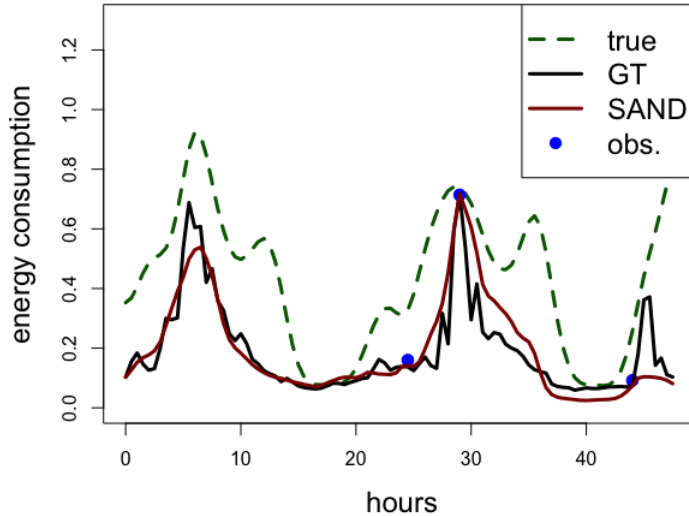

Figure S2: An imputation by SAND from the UK electricity testing set. The green curve represents the underlying electricity usage where three observations (blue dots) are sampled. The black line (‘GT’) refers to the imputation from a vanilla transformer and the red line is the output of SAND.

Table S2: Full Tables 1 from the main paper. The eigenvalues follow an exponential with rate 1, the number of bases is 40 ( $K = 20$ ), the time points within any subject are independently sampled, and the signal-to-noise ratio is 4. Bold values indicate the top 2 performing methods.

|                                                    | $n_i = 30$        |                   | $n_i = 8 \text{ to } 12$ |                   | $n_i = 3, 4, 5$  |                   |
|----------------------------------------------------|-------------------|-------------------|--------------------------|-------------------|------------------|-------------------|
|                                                    | MSE(SE)           | TV(SE)            | MSE(SE)                  | TV(SE)            | MSE(SE)          | TV(SE)            |
| PACE                                               | 189.9(4.3)        | 187.1(2.0)        | 450.0(15)                | 201.9(2.1)        | 795.5(33)        | 209.5(2.2)        |
| FACE                                               | 284.6(8.8)        | 198.9(2.1)        | 488.2(16)                | 204.5(2.2)        | 807.1(32)        | 209.5(2.2)        |
| mFPCA                                              | 224.7(5.8)        | 192.0(2.1)        | 480.3(16)                | 204.0(2.2)        | 787.1(31)        | <b>209.3(2.2)</b> |
| MICE                                               | 176.7(3.7)        | 233.1(1.7)        | 721.6(27)                | 318.4(3.0)        | 1416(57)         | 332.7(2.8)        |
| CNP                                                | 290.4(11)         | 198.9(2.0)        | 551.3(21)                | 207.6(2.1)        | 920.3(52)        | 211.9(2.2)        |
| GAIN                                               | 261.9(6.8)        | 350.0(3.4)        | 1454(52)                 | 413.1(5.1)        | 1862(51)         | 385.4(4.3)        |
| IDS                                                | 262.9(6.0)        | 273.8(2.4)        | 735.3(22)                | 305.7(3.7)        | 1157(43)         | 263.3(3.1)        |
| ReLU-activated transformers with penalties         |                   |                   |                          |                   |                  |                   |
| RT1                                                | 172.1(3.2)        | 213.2(1.8)        | 439.2(15)                | 225.0(2.2)        | 802.1(35)        | 232.0(2.5)        |
| RT1P                                               | 170.6(3.4)        | 192.6(1.9)        | 426.5(14)                | 202.9(2.1)        | 781.5(34)        | 212.9(2.3)        |
| RT1S                                               | 172.0(3.2)        | 213.2(1.8)        | 439.1(15)                | 225.0(2.2)        | 801.3(35)        | 232.0(2.5)        |
| RT2                                                | 172.6(3.4)        | 225.2(1.7)        | 432.4(14)                | 216.1(2.3)        | 801.7(39)        | 224.8(2.2)        |
| RT2P                                               | 174.2(3.9)        | 181.9(2.0)        | 425.1(13)                | 198.7(2.3)        | 791.2(39)        | 213.9(1.9)        |
| RT2S                                               | 165.3(3.2)        | 177.3(1.6)        | 429.9(13)                | 206.7(2.3)        | 801.7(39)        | 224.8(2.2)        |
| GeLU-activated transformers with penalties         |                   |                   |                          |                   |                  |                   |
| GT1                                                | 169.8(3.2)        | 218.2(1.7)        | 436.7(15)                | 227.0(2.2)        | 798.6(35)        | 230.6(2.6)        |
| GT1P                                               | 169.0(3.5)        | 179.9(2.0)        | 425.3(14)                | <b>199.4(2.1)</b> | <b>777.4(34)</b> | 210.2(2.2)        |
| GT1S                                               | 169.8(3.2)        | 218.1(1.7)        | 436.7(15)                | 227.0(2.2)        | 796.5(35)        | 227.6(2.6)        |
| GT2                                                | 174.8(3.5)        | 223.0(1.7)        | 433.8(14)                | 221.9(2.1)        | 804.5(39)        | 226.1(2.4)        |
| GT2P                                               | 179.9(3.9)        | 182.1(2.0)        | <b>422.6(13)</b>         | <b>199.4(2.1)</b> | 788.9(39)        | 210.0(2.2)        |
| GT2S                                               | <b>160.8(3.4)</b> | <b>168.5(1.5)</b> | 427.7(13)                | 208.8(2.1)        | 804.5(39)        | 226.1(2.4)        |
| GeLU-activated transformers with augmented modules |                   |                   |                          |                   |                  |                   |
| ATT                                                | 185.1(3.8)        | 220.0(1.7)        | 446.9(14)                | 220.6(2.1)        | 852.0(42)        | 224.0(2.5)        |
| SAND                                               | <b>146.5(2.7)</b> | <b>164.6(1.8)</b> | <b>410.9(13)</b>         | <b>196.8(2.0)</b> | <b>758.1(43)</b> | <b>206.8(2.2)</b> |

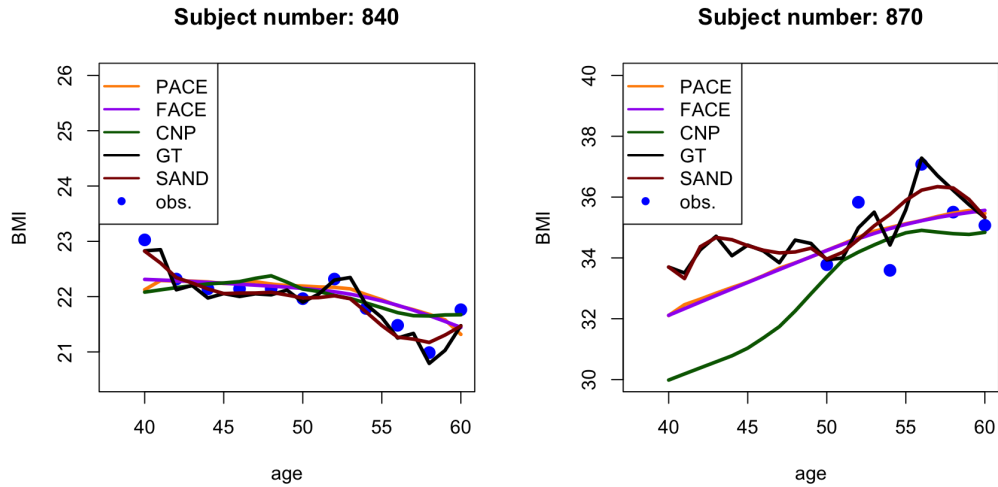

Figure S3: Imputations from the top 4 performing methods in the Framingham Heart Study dataset.

Table S3: The setting is similar to the one used in Table S2: the eigenvalues follow an exponential with rate 1, the number of bases is 40 ( $K = 20$ ) and the time points within any subject are independently sampled; except that the signal-to-noise ratio is 0. Bold values indicate the top 2 performing methods.

|                                                    | $n_i = 30$         |                    | $n_i = 8 \text{ to } 12$ |                    | $n_i = 3, 4, 5$   |                    |
|----------------------------------------------------|--------------------|--------------------|--------------------------|--------------------|-------------------|--------------------|
|                                                    | MSE(SE)            | TV(SE)             | MSE(SE)                  | TV(SE)             | MSE(SE)           | TV(SE)             |
| PACE                                               | 155.8(4.3)         | 183.8(2.1)         | 400.4(14)                | 200.3(2.2)         | 744.4(31)         | 208.9(2.2)         |
| FACE                                               | 264.4(8.8)         | 198.0(2.1)         | 449.6(16)                | 203.6(2.2)         | 757.5(30)         | 208.9(2.2)         |
| mFPCA                                              | 196.8(5.7)         | 190.0(2.1)         | 438.4(15)                | 203.2(2.2)         | 860.1(43)         | 211.6(2.2)         |
| MICE                                               | 112.4(3.6)         | 145.2(1.6)         | 689.7(26)                | 299.4(3.0)         | 1403(57)          | 323.2(2.8)         |
| CNP                                                | 261.2(10)          | 197.0(2.1)         | 542.0(27)                | 206.9(2.2)         | 845.7(43)         | 210.9(2.2)         |
| GAIN                                               | 169.9(4.4)         | 229.8(2.4)         | 1179(43)                 | 383.0(3.9)         | 1951(54)          | 423.7(2.6)         |
| IDS                                                | 157.4(5.4)         | 193.1(2.2)         | 648.6(21)                | 283.6(3.7)         | 1082(43)          | 253.6(2.8)         |
| ReLU-activated transformers with penalties         |                    |                    |                          |                    |                   |                    |
| RT1                                                | <b>96.22</b> (2.3) | 152.8(1.6)         | 373.8(14)                | 209.9(2.2)         | 730.5(35)         | 225.7(2.5)         |
| RT1P                                               | 125.5(2.9)         | 179.6(2.0)         | 374.4(13)                | 199.0(2.3)         | <b>714.1</b> (34) | 207.2(2.2)         |
| RT1S                                               | 97.11(2.4)         | <b>151.2</b> (1.5) | 372.3(15)                | 196.1(2.1)         | 726.0(34)         | 219.3(2.3)         |
| RT2                                                | 99.79(2.4)         | 151.5(1.6)         | 373.5(14)                | 221.4(2.2)         | 733.8(37)         | 223.5(2.5)         |
| RT2P                                               | 132.3(3.0)         | 183.3(1.9)         | 370.2(14)                | 204.6(2.1)         | 718.2(35)         | 210.1(2.1)         |
| RT2S                                               | 102.5(2.4)         | 156.6(1.6)         | 368.4(13)                | 213.3(2.1)         | 736.7(37)         | 225.9(2.5)         |
| GeLU-activated transformers with penalties         |                    |                    |                          |                    |                   |                    |
| GT1                                                | 98.22(2.3)         | 153.3(1.6)         | 371.8(13)                | 207.6(2.2)         | 735.9(35)         | 226.4(2.4)         |
| GT1P                                               | 131.5(3.0)         | 182.7(2.0)         | 372.5(13)                | 197.1(2.1)         | 719.5(34)         | 208.8(2.2)         |
| GT1S                                               | 101.0(2.4)         | 156.8(1.5)         | <b>368.2</b> (13)        | 198.2(2.1)         | 731.0(35)         | 219.0(2.3)         |
| GT2                                                | 100.9(2.4)         | 152.4(1.6)         | 376.1(14)                | 211.2(2.2)         | 736.8(37)         | 224.8(2.5)         |
| GT2P                                               | 133.0(3.0)         | 183.0(2.0)         | 372.4(13)                | <b>196.7</b> (2.1) | 720.1(36)         | <b>208.8</b> (2.2) |
| GT2S                                               | 105.7(2.5)         | 156.1(1.6)         | 371.7(13)                | 200.2(2.1)         | 736.8(37)         | 224.8(2.5)         |
| GeLU-activated transformers with augmented modules |                    |                    |                          |                    |                   |                    |
| ATT                                                | 122.6(3.2)         | 170.6(1.7)         | 416.3(13)                | 211.4(2.2)         | 808.4(34)         | 221.1(2.4)         |
| SAND                                               | <b>90.88</b> (2.3) | <b>147.7</b> (1.6) | <b>347.3</b> (13)        | <b>190.8</b> (2.1) | <b>688.4</b> (32) | <b>208.2</b> (2.2) |

Table S4: The eigenvalues follow an exponential with rate 1, the number of bases is 40 ( $K = 20$ ), the time points within any subject are dependently sampled, and the signal-to-noise ratio is 4. Bold values indicate the top 2 performing methods.

|                                                    | $n_i = 30$         |                    | $n_i = 8 \text{ to } 12$ |                    | $n_i = 3, 4, 5$   |                    |
|----------------------------------------------------|--------------------|--------------------|--------------------------|--------------------|-------------------|--------------------|
|                                                    | MSE(SE)            | TV(SE)             | MSE(SE)                  | TV(SE)             | MSE(SE)           | TV(SE)             |
| PACE                                               | 325.9(10)          | 193.7(2.1)         | 567.1(19)                | 204.5(2.2)         | 839.3(37)         | 210.6(2.2)         |
| FACE                                               | 419.7(15)          | 203.1(2.2)         | 659.5(24)                | 207.0(2.2)         | 842.7(34)         | 210.4(2.2)         |
| mFPCA                                              | 354.6(11)          | 199.4(2.1)         | 588.9(21)                | 206.2(2.2)         | 859.2(34)         | 212.0(2.2)         |
| MICE                                               | 395.1(17)          | 235.4(1.7)         | 815.3(29)                | 276.9(2.5)         | 1401(56)          | 321.3(2.8)         |
| CNP                                                | 709.2(35)          | 211.2(2.2)         | 696.3(33)                | 210.2(2.2)         | 1007(45)          | 212.4(2.2)         |
| GAIN                                               | 676.7(31)          | 379.1(3.9)         | 1564(57)                 | 431.1(4.3)         | 1955(56)          | 420.4(2.7)         |
| IDS                                                | 567.8(21)          | 266.2(2.1)         | 904.1(32)                | 276.0(3.1)         | 1157(42)          | 255.0(2.8)         |
| GeLU-activated transformers with penalties         |                    |                    |                          |                    |                   |                    |
| GT1                                                | 307.2(9.2)         | 246.9(1.8)         | 575.7(18)                | 250.8(2.5)         | 842.1(40)         | 255.8(2.4)         |
| GT1P                                               | 304.0(9.2)         | 189.2(2.0)         | 553.8(18)                | <b>203.1</b> (2.1) | <b>828.2</b> (40) | <b>209.3</b> (2.4) |
| GT1S                                               | <b>286.1</b> (9.1) | <b>179.7</b> (1.7) | 575.7(18)                | 250.8(2.5)         | 841.7(40)         | 255.8(2.3)         |
| GT2                                                | 324.3(11)          | 248.8(1.8)         | 573.7(20)                | 254.9(2.5)         | 845.6(43)         | 259.2(2.1)         |
| GT2P                                               | 319.7(10)          | 190.2(2.0)         | <b>551.0</b> (19)        | 203.4(2.2)         | 830.1(43)         | 210.3(2.0)         |
| GT2S                                               | 302.0(11)          | 181.0(1.7)         | 573.7(20)                | 254.9(2.5)         | 845.6(43)         | 259.2(2.1)         |
| GeLU-activated transformers with augmented modules |                    |                    |                          |                    |                   |                    |
| ATT                                                | 307.2(9.8)         | 224.1(1.8)         | 583.3(18)                | 228.5(2.4)         | 902.3(45)         | 227.0(2.4)         |
| SAND                                               | <b>280.2</b> (8.1) | <b>174.5</b> (1.8) | <b>531.3</b> (18)        | <b>201.6</b> (2.1) | <b>823.1</b> (46) | <b>207.6</b> (2.2) |



Table S5: The setting is similar to the one used in Table S4: the eigenvalues follow an exponential with rate 1, the number of bases is 40 ( $K = 20$ ) and the time points within any subject are dependently sampled; except that the signal-to-noise ratio is 0. Bold values indicate the top 2 performing methods.

|                                                    | $n_i = 30$         |                    | $n_i = 8 \text{ to } 12$ |                    | $n_i = 3, 4, 5$   |                    |
|----------------------------------------------------|--------------------|--------------------|--------------------------|--------------------|-------------------|--------------------|
|                                                    | MSE(SE)            | TV(SE)             | MSE(SE)                  | TV(SE)             | MSE(SE)           | TV(SE)             |
| PACE                                               | 306.6(11)          | 191.7(2.1)         | 528.5(19)                | 203.5(2.2)         | 804.8(38)         | <b>210.1</b> (2.2) |
| FACE                                               | 415.1(16)          | 202.9(2.2)         | 631.9(23)                | 206.6(2.2)         | 804.4(34)         | <b>210.0</b> (2.2) |
| mFPCA                                              | 312.2(11)          | 196.1(2.1)         | 562.4(21)                | 206.0(2.2)         | 832.4(35)         | 212.1(2.2)         |
| MICE                                               | 363.4(17)          | 137.4(1.6)         | 784.7(28)                | 253.7(2.4)         | 1385(56)          | 314.0(2.8)         |
| CNP                                                | 765.3(39)          | 210.8(2.2)         | 707.0(33)                | 210.2(2.2)         | 953.4(47)         | 212.2(2.2)         |
| GAIN                                               | 644.0(30)          | 307.8(3.8)         | 1563(57)                 | 410.2(4.4)         | 1919(56)          | 431.4(2.6)         |
| IDS                                                | 496.6(21)          | 179.5(2.1)         | 837.3(31)                | 254.1(3.0)         | 1120(43)          | 252.2(3.0)         |
| GeLU-activated transformers with penalties         |                    |                    |                          |                    |                   |                    |
| GT1                                                | <b>249.6</b> (9.4) | 163.3(1.7)         | 506.7(17)                | 221.8(2.3)         | 799.0(45)         | 229.4(2.3)         |
| GT1P                                               | 273.5(9.3)         | 185.9(2.1)         | 499.7(17)                | 201.3(2.1)         | <b>780.4</b> (44) | 210.6(2.2)         |
| GT1S                                               | <b>249.6</b> (9.4) | 163.4(1.7)         | 506.7(17)                | 221.8(2.3)         | 797.3(45)         | 223.1(2.3)         |
| GT2                                                | 251.8(9.9)         | 166.2(1.8)         | 511.1(17)                | 221.2(2.3)         | 800.7(48)         | 225.5(2.3)         |
| GT2P                                               | 273.7(9.6)         | 186.1(2.1)         | <b>503.9</b> (17)        | <b>201.1</b> (2.2) | 787.2(47)         | 210.5(2.5)         |
| GT2S                                               | 251.8(9.9)         | 166.2(1.8)         | 511.1(17)                | 221.2(2.3)         | 800.7(48)         | 225.5(2.4)         |
| GeLU-activated transformers with augmented modules |                    |                    |                          |                    |                   |                    |
| ATT                                                | 251.5(9.1)         | <b>160.5</b> (1.7) | 508.5(17)                | 220.1(2.3)         | 853.6(42)         | 224.3(2.5)         |
| SAND                                               | <b>231.9</b> (8.5) | <b>159.1</b> (1.9) | <b>482.9</b> (17)        | <b>196.2</b> (2.1) | <b>766.3</b> (40) | <b>210.1</b> (2.2) |

Table S6: MSE (SE) and TV (SE) on the testing set. The eigenvalues follow an exponential distribution, the number of bases is 10 ( $K = 5$ ) and the time points are sampled independently within any subject. Bold values indicate the top 2 performing methods.

|              | with measurement errors |                     |                          |                    | without measurement errors |                     |                          |                    |
|--------------|-------------------------|---------------------|--------------------------|--------------------|----------------------------|---------------------|--------------------------|--------------------|
|              | $n_i = 30$              |                     | $n_i = 8 \text{ to } 12$ |                    | $n_i = 30$                 |                     | $n_i = 8 \text{ to } 12$ |                    |
|              | MSE(SE)                 | TV(SE)              | MSE(SE)                  | TV(SE)             | MSE(SE)                    | TV(SE)              | MSE(SE)                  | TV(SE)             |
| PACE         | <b>37.85</b> (1.0)      | <b>34.53</b> (0.5)  | <b>254.2</b> (16)        | <b>69.40</b> (1.6) | <b>2.889</b> (0.2)         | <b>17.54</b> (0.4)  | <b>173.9</b> (16)        | <b>58.14</b> (1.6) |
| FACE         | 127.6(8.5)              | 64.87(1.6)          | 309.0(18)                | 77.78(1.7)         | 103.3(8.3)                 | 61.52(1.6)          | 256.6(19)                | 73.09(1.8)         |
| mFPCA        | 108.7(7.9)              | 61.66(1.6)          | 273.5(17)                | 72.94(1.7)         | 84.32(7.9)                 | 57.86(1.7)          | 226.6(19)                | 67.21(1.8)         |
| MICE         | 70.31(2.4)              | 153.5(1.1)          | 568.4(25)                | 223.7(2.8)         | 14.15(1.5)                 | 30.71(0.6)          | 527.3(23)                | 202.5(2.7)         |
| CNP          | 105.8(5.0)              | 65.8(0.88)          | 354.4(17)                | 85.58(1.7)         | 66.29(4.1)                 | 56.93(0.8)          | 302.9(16)                | 82.01(1.6)         |
| GAIN         | 86.37(2.6)              | 166.6(1.4)          | 906.4(37)                | 321.1(3.4)         | 43.13(2.3)                 | 83.98(1.2)          | 883.5(37)                | 276.5(3.4)         |
| IDS          | 115.0(7.6)              | 55.48(1.1)          | 524.7(22)                | 203.7(3.5)         | 25.61(4.5)                 | 43.92(1.0)          | 452.4(21)                | 185.3(3.8)         |
| Transformers |                         |                     |                          |                    |                            |                     |                          |                    |
| GT           | 65.82(1.5)              | 132.9(0.92)         | 255.4(12)                | 110.3(1.6)         | 5.417(0.37)                | 30.75(0.6)          | <b>173.9</b> (11)        | 86.54(1.5)         |
| SAND         | <b>36.32</b> (1.2)      | <b>34.41</b> (0.46) | <b>218.4</b> (12)        | <b>72.85</b> (1.3) | <b>2.685</b> (0.2)         | <b>9.678</b> (0.25) | <b>149.7</b> (10)        | <b>54.03</b> (1.3) |

Table S7: MSE (SE) and TV (SE) on the testing set. The eigenvalues follow a  $t$ -distribution, the number of bases is 40 ( $K = 20$ ) and the time points are sampled independently within any subject. Bold values indicate the top 2 performing methods.

|              | with measurement errors |                    |                   |                    | without measurement errors |                    |                   |                    |
|--------------|-------------------------|--------------------|-------------------|--------------------|----------------------------|--------------------|-------------------|--------------------|
|              | $n_i = 30$              |                    | $n_i = 8$ to 12   |                    | $n_i = 30$                 |                    | $n_i = 8$ to 12   |                    |
|              | MSE(SE)                 | TV(SE)             | MSE(SE)           | TV(SE)             | MSE(SE)                    | TV(SE)             | MSE(SE)           | TV(SE)             |
| PACE         | 317.4(7.2)              | <b>244.1</b> (2.3) | <b>744.9</b> (20) | <b>265.2</b> (2.4) | 254.2(6.8)                 | 239.1(2.3)         | 671.3(20)         | <b>263.7</b> (2.4) |
| FACE         | 472.9(11)               | 260.8(2.3)         | 796.3(22)         | 267.6(2.4)         | 434.3(11)                  | 259.9(2.3)         | 729.2(22)         | 266.5(2.4)         |
| mFPCA        | 440.3(11)               | 258.5(2.3)         | 762.5(21)         | 265.6(2.4)         | 401.0(10)                  | 257.4(2.3)         | 695.3(21)         | 264.2(2.4)         |
| MICE         | 304.9(5.8)              | 300.6(1.9)         | 1258(40)          | 419.6(3.4)         | 188.9(4.9)                 | <b>190.6</b> (1.7) | 1200(39)          | 395.7(3.4)         |
| CNP          | 519.1(12)               | 262.7(2.3)         | 984.1(30)         | 273.5(2.3)         | 410.4(12)                  | 257.7(2.3)         | 920.1(27)         | 273.4(2.3)         |
| GAIN         | 376.1(7.7)              | 377.6(2.8)         | 2019(68)          | 511.5(4.6)         | 299.7(7.6)                 | 303.4(2.9)         | 1893(63)          | 488.9(4.5)         |
| IDS          | 437.8(8.2)              | 351.6(2.7)         | 1229(34)          | 398.3(3.9)         | 265.2(6.9)                 | 252.1(2.4)         | 1093(35)          | 374.8(4.0)         |
| Transformers |                         |                    |                   |                    |                            |                    |                   |                    |
| GT           | <b>297.5</b> (6.0)      | 284.5(1.9)         | 776.2(21)         | 289.0(2.3)         | <b>171.6</b> (4.6)         | 201.7(1.8)         | <b>666.1</b> (19) | 271.1(2.3)         |
| SAND         | <b>264.0</b> (5.4)      | <b>215.7</b> (1.9) | <b>731.1</b> (20) | <b>259.5</b> (2.2) | <b>174.5</b> (4.5)         | <b>197.6</b> (2.1) | <b>637.2</b> (18) | <b>253.7</b> (2.3) |

Table S8: MSE (SE) and TV (SE) on the testing set. The eigenvalues follow a  $t$ -distribution, the number of bases is 10 ( $K = 5$ ) and the time points are sampled independently within any subject. Bold values indicate the top 2 performing methods.

|              | with measurement errors |                    |                   |                    | without measurement errors |                    |                   |                    |
|--------------|-------------------------|--------------------|-------------------|--------------------|----------------------------|--------------------|-------------------|--------------------|
|              | $n_i = 30$              |                    | $n_i = 8$ to 12   |                    | $n_i = 30$                 |                    | $n_i = 8$ to 12   |                    |
|              | MSE(SE)                 | TV(SE)             | MSE(SE)           | TV(SE)             | MSE(SE)                    | TV(SE)             | MSE(SE)           | TV(SE)             |
| PACE         | <b>64.88</b> (1.6)      | <b>45.28</b> (0.6) | <b>397.4</b> (14) | <b>93.13</b> (1.6) | <b>3.352</b> (0.2)         | <b>21.43</b> (0.3) | <b>278.3</b> (13) | <b>82.98</b> (1.7) |
| FACE         | 206.6(7.3)              | 87.41(1.6)         | 503.2(22)         | 103.0(1.7)         | 168.9(7.2)                 | 83.67(1.7)         | 414.1(20)         | 98.21(1.8)         |
| mFPCA        | 175.6(6.5)              | 83.99(1.6)         | 435.3(15)         | 98.08(1.7)         | 136.4(6.4)                 | 79.65(1.7)         | 366.4(17)         | 92.31(1.9)         |
| MICE         | 131.9(13)               | 203.8(2.6)         | 1074(68)          | 306.1(3.6)         | 40.22(13)                  | 43.93(2.5)         | 1015(66)          | 278.2(3.7)         |
| CNP          | 272.0(62)               | 92.32(1.2)         | 767.0(76)         | 117.7(1.7)         | 242.3(100)                 | 81.27(1.3)         | 684.0(51)         | 115.5(1.8)         |
| GAIN         | 171.1(15)               | 225.0(3.8)         | 2166(140)         | 417.2(5.7)         | 97.85(13)                  | 121.5(3.6)         | 1663(110)         | 361.6(4.7)         |
| IDS          | 184.9(6.9)              | 73.09(1.2)         | 981.2(71)         | 270.0(4.4)         | 42.20(3.1)                 | 59.30(1.1)         | 854.7(70)         | 239.8(4.5)         |
| Transformers |                         |                    |                   |                    |                            |                    |                   |                    |
| GT           | 126.6(4.1)              | 176.3(1.1)         | 480.7(22)         | 146.3(1.9)         | 13.98(4.2)                 | 40.30(0.8)         | 336.7(19)         | 121.0(1.9)         |
| SAND         | <b>80.58</b> (2.8)      | <b>53.6</b> (0.65) | <b>424.2</b> (18) | <b>96.35</b> (1.4) | <b>9.181</b> (4.0)         | <b>13.00</b> (0.5) | <b>295.0</b> (17) | <b>74.47</b> (1.5) |

Table S9: MSE (SE) and TV (SE) on the testing set. The eigenvalues follow a standard Gaussian, the number of bases is 40 ( $K = 20$ ) and the time points are sampled independently within any subject. Bold values indicate the top 2 performing methods.

|              | with measurement errors |                    |                   |                    | without measurement errors |                    |                   |                    |
|--------------|-------------------------|--------------------|-------------------|--------------------|----------------------------|--------------------|-------------------|--------------------|
|              | $n_i = 30$              |                    | $n_i = 8$ to 12   |                    | $n_i = 30$                 |                    | $n_i = 8$ to 12   |                    |
|              | MSE(SE)                 | TV(SE)             | MSE(SE)           | TV(SE)             | MSE(SE)                    | TV(SE)             | MSE(SE)           | TV(SE)             |
| PACE         | 183.4(2.6)              | <b>186.9</b> (1.1) | <b>451.0</b> (10) | <b>203.3</b> (1.1) | 145.3(2.3)                 | 183.2(1.1)         | <b>397.8</b> (10) | <b>201.7</b> (1.1) |
| FACE         | 276.6(4.3)              | 199.9(1.1)         | 496.9(11)         | 205.9(1.1)         | 255.6(4.2)                 | 199.3(1.1)         | 451.3(11)         | 205.0(1.1)         |
| mFPCA        | 258.9(4.2)              | 198.2(1.1)         | 466.9(11)         | 204.3(1.1)         | 236.9(4.2)                 | 197.7(1.1)         | 422.8(11)         | 203.1(1.2)         |
| MICE         | 189.2(2.7)              | 231.0(0.4)         | 816.5(20)         | 327.5(0.6)         | 112.1(2.6)                 | 145.5(0.3)         | 773.7(19)         | 308.3(0.6)         |
| CNP          | 308.1(21)               | 201.0(1.2)         | 636.4(24)         | 210.6(1.2)         | 247.9(7.1)                 | 198.2(1.2)         | 570.5(17)         | 209.5(1.1)         |
| GAIN         | 241.4(4.2)              | 288.4(1.5)         | 1535(45)          | 392.8(3.9)         | 159.1(2.9)                 | 221.3(1.4)         | 1525(45)          | 383.5(3.9)         |
| IDS          | 255.3(4.1)              | 271.3(1.7)         | 797.6(19)         | 313.4(2.9)         | 157.7(3.4)                 | 196.7(1.4)         | 705.4(18)         | 291.9(2.7)         |
| Transformers |                         |                    |                   |                    |                            |                    |                   |                    |
| GT           | <b>174.3</b> (2.7)      | 222.6(1.1)         | 485.4(12)         | 220.4(1.2)         | <b>99.32</b> (2.1)         | <b>150.8</b> (1.0) | 418.6(11)         | 209.9(1.2)         |
| SAND         | <b>154.9</b> (2.6)      | <b>167.1</b> (1.1) | <b>456.5</b> (11) | <b>199.6</b> (1.1) | <b>103.4</b> (2.1)         | <b>153.3</b> (1.1) | <b>397.4</b> (10) | <b>194.1</b> (1.2) |

Table S10: MSE (SE) and TV (SE) on the testing set. The eigenvalues follow a standard Gaussian, the number of bases is 10 ( $K = 5$ ) and the time points are sampled independently within any subject. Bold values indicate the top 2 performing methods.

|              | with measurement errors |                    |                          |                    | without measurement errors |                    |                          |                    |
|--------------|-------------------------|--------------------|--------------------------|--------------------|----------------------------|--------------------|--------------------------|--------------------|
|              | $n_i = 30$              |                    | $n_i = 8 \text{ to } 12$ |                    | $n_i = 30$                 |                    | $n_i = 8 \text{ to } 12$ |                    |
|              | MSE(SE)                 | TV(SE)             | MSE(SE)                  | TV(SE)             | MSE(SE)                    | TV(SE)             | MSE(SE)                  | TV(SE)             |
| PACE         | <b>39.01</b> (0.9)      | <b>34.55</b> (0.4) | <b>227.6</b> (7.2)       | <b>70.66</b> (1.0) | <b>1.351</b> (0.1)         | <b>15.56</b> (0.2) | <b>142.6</b> (6.0)       | <b>58.14</b> (1.0) |
| FACE         | 124.6(3.6)              | 68.74(1.1)         | 314.7(9.6)               | 81.39(1.1)         | 101.8(3.5)                 | 66.12(1.1)         | 269.3(9.5)               | 77.74(1.2)         |
| mFPCA        | 106.5(3.3)              | 65.76(1.0)         | 262.1(8.3)               | 77.37(1.1)         | 82.07(3.2)                 | 62.51(1.1)         | 222.7(9.1)               | 73.06(1.3)         |
| MICE         | 70.44(1.6)              | 153.2(0.9)         | 618.3(17)                | 234.3(2.0)         | 13.26(1.0)                 | 29.73(0.5)         | 576.0(16)                | 212.8(1.9)         |
| CNP          | 102.4(5.0)              | 68.37(0.6)         | 398.7(12)                | 91.43(1.0)         | 69.82(4.5)                 | 62.35(0.7)         | 346.1(11)                | 90.15(1.1)         |
| GAIN         | 80.49(1.9)              | 160.9(1.1)         | 1355(42)                 | 309.0(4.1)         | 31.63(1.4)                 | 68.36(1.0)         | 1019(26)                 | 293.9(2.9)         |
| IDS          | 123.4(10)               | 57.93(0.8)         | 549.4(16)                | 213.0(2.8)         | 25.58(2.2)                 | 46.79(0.7)         | 470.3(16)                | 190.0(2.7)         |
| Transformers |                         |                    |                          |                    |                            |                    |                          |                    |
| GT           | 75.86(1.2)              | 140.9(0.9)         | 283.3(8.6)               | 111.1(1.0)         | 6.418(0.4)                 | 34.13(0.4)         | 191.8(7.4)               | 91.76(1.0)         |
| SAND         | <b>50.08</b> (1.1)      | <b>42.87</b> (0.5) | <b>253.8</b> (8.3)       | <b>77.01</b> (0.9) | <b>3.413</b> (0.3)         | <b>11.71</b> (0.2) | <b>168.4</b> (7.2)       | <b>58.12</b> (0.9) |

Table S11: MSE(SE) and TV(SE) on the UK electricity dataset when  $t_{ij}$  are sampled dependently. Bold values indicate the top 2 performing methods.

|       | UK electricity     |                    |                          |                    |                    |                    |
|-------|--------------------|--------------------|--------------------------|--------------------|--------------------|--------------------|
|       | $n_i = 30$         |                    | $n_i = 8 \text{ to } 12$ |                    | $n_i = 3, 4, 5$    |                    |
|       | MSE(SE)            | TV(SE)             | MSE(SE)                  | TV(SE)             | MSE(SE)            | TV(SE)             |
| PACE  | 18.24(2.9)         | <b>19.36</b> (1.1) | 30.17(4.0)               | <b>21.15</b> (1.2) | 46.34(5.8)         | <b>22.25</b> (1.2) |
| FACE  | 27.52(4.2)         | 21.93(1.2)         | 38.61(5.4)               | 22.78(1.2)         | 48.19(6.2)         | 23.47(1.2)         |
| mFPCA | 20.67(3.1)         | 22.70(1.2)         | 32.45(4.3)               | 24.39(1.2)         | <b>46.26</b> (6.1) | 23.63(1.2)         |
| MICE  | 24.49(3.2)         | 59.05(2.6)         | 44.39(5.9)               | 57.18(2.3)         | 74.86(8.5)         | 68.06(1.7)         |
| CNP   | 26.06(3.8)         | 21.43(1.2)         | 36.73(4.7)               | 22.17(1.2)         | 65.11(12)          | <b>22.80</b> (1.2) |
| GAIN  | 35.70(4.9)         | 84.94(4.1)         | 56.27(7.8)               | 82.33(3.3)         | 124.9(16)          | 52.43(2.7)         |
| IDS   | 58.51(7.7)         | 49.53(2.6)         | 83.27(11)                | 38.81(2.2)         | 108.4(13)          | 36.54(2.2)         |
| GT    | <b>16.17</b> (2.8) | 22.04(1.2)         | <b>25.77</b> (3.5)       | 25.41(1.4)         | 49.69(7.0)         | 40.92(2.7)         |
| SAND  | <b>15.69</b> (2.8) | <b>17.85</b> (1.1) | <b>24.09</b> (3.4)       | <b>20.54</b> (1.2) | <b>45.50</b> (6.4) | 29.40(1.9)         |

## References

- [1] James, G. M., T. J. Hastie, and C. A. Sugar (2000). Principal component models for sparse functional data. *Biometrika* 87(3), 587–602.
- [2] Peng, J. and D. Paul (2009). A geometric approach to maximum likelihood estimation of the functional principal components from sparse longitudinal data. *Journal of Computational and Graphical Statistics* 18(4), 995–1015.
- [3] Rice, J. A. and C. O. Wu (2001). Nonparametric mixed effects models for unequally sampled noisy curves. *Biometrics* 57(1), 253–259.
